# Supplementary figures and images for: Maximizing Completion of the Two-Dose COVID-19 Vaccine Series with Aid from Infographics
Source: MDPI journal article supplement (doi:10.3390/vaccines9111229), 2021-10-22

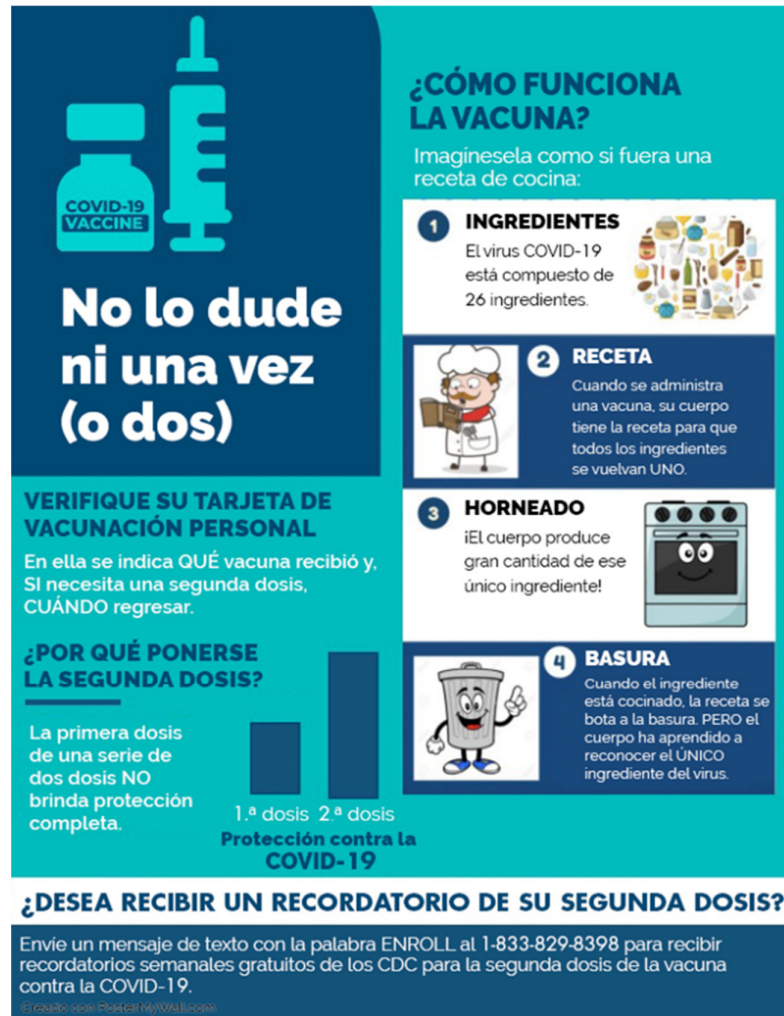

Figure S1. COVID-19 infographic from Figure 1 of the main text translated to Spanish.

Supplement: s1 [file s1]
